# Supplementary material for: Strain-level diversity of commercial probiotic isolates of Bacillus, Lactobacillus, and Saccharomyces species illustrated by molecular identification and phenotypic profiling
Source: PLoS One. 2019 Mar 22;14(3):e0213841. doi: 10.1371/journal.pone.0213841 (PMC6430388; doi:10.1371/journal.pone.0213841)
Supplement: S5 Table — The result from each reaction well of the GenIII Biolog plate was compared across the strains of each species isolated from probiotic products. Disagreement is defined as one or more strains of that species showing a different reaction result from others: Positive (P), negative (-), or borderline ('h'). (XLSX) [file pone.0213841.s005.xlsx]

## Sheet: S5 Table
S5 Table. Biolog assay reaction wells with variable results within species.
	Disagreement (Carbon source utilization wells)	Disagreement (Chemical sensitivity wells)	% of Totala
Bacillus coagulans	16	5	21 (22%)
Bacillus subtilis	19	4	23 (24%)
Lactobacillus plantarum	10	4	15 (16%)
Lactobacillus rhamnosus	15	17	32 (34%)
aBiolog GenIII microplate contains a total of 94 assay wells plus a positive and negative control. Results from 70 of the wells
(47 carbon sources and 23 chemical sensitivity) are summarized in Figs 2A-2C; most of the other 24 wells were negative.
.
The result from each reaction well of the GenIII Biolog plate was compared across the strains of each species isolated from probiotic products.
Disagreement is defined as one or more strains of that species showing a different reaction result from others: Positive (P), negative (-), or borderline ('h').
